# Supplementary material
Source: PubMed Central journal article supplement (PMC6606396)
Supplement: NIHMS1526279-supplement-1.pdf [file NIHMS1526279-supplement-1.pdf]

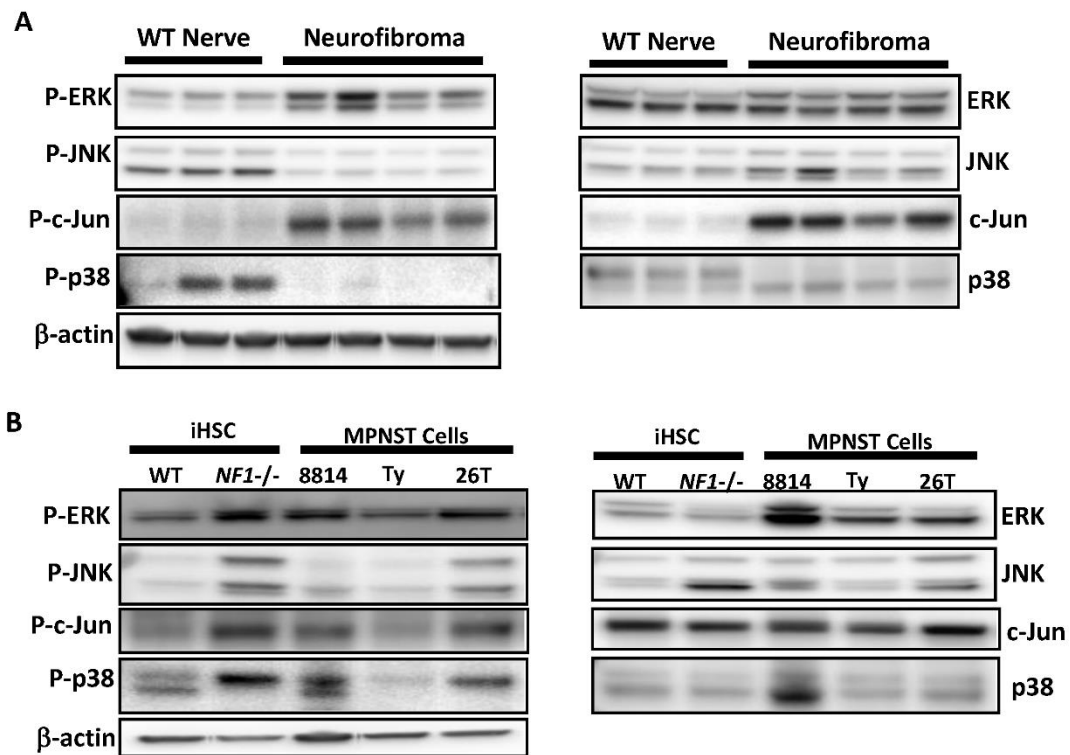

**Figure S1.** MAPK signaling in neurofibroma and MPNST. **A**, Immunoblots showing phosphorylated and total levels of ERK, JNK, c-jun and p38 in *Dhh* Cre; *Nf1* fl/fl mouse neurofibroma versus normal age-matched wildtype sciatic nerve (WT nerve). **B**, Immunoblots showing phosphorylated and total levels of ERK, JNK, c-jun and p38 in *NF1*<sup>-/-</sup> iHSC and MPNST cell lines versus *NF1* WT iHSC. B-actin was used as a loading control.
