# Supplementary material
Source: PubMed Central journal article supplement (PMC6606396)
Supplement: NIHMS1526279-supplement-2.pdf [file NIHMS1526279-supplement-2.pdf]

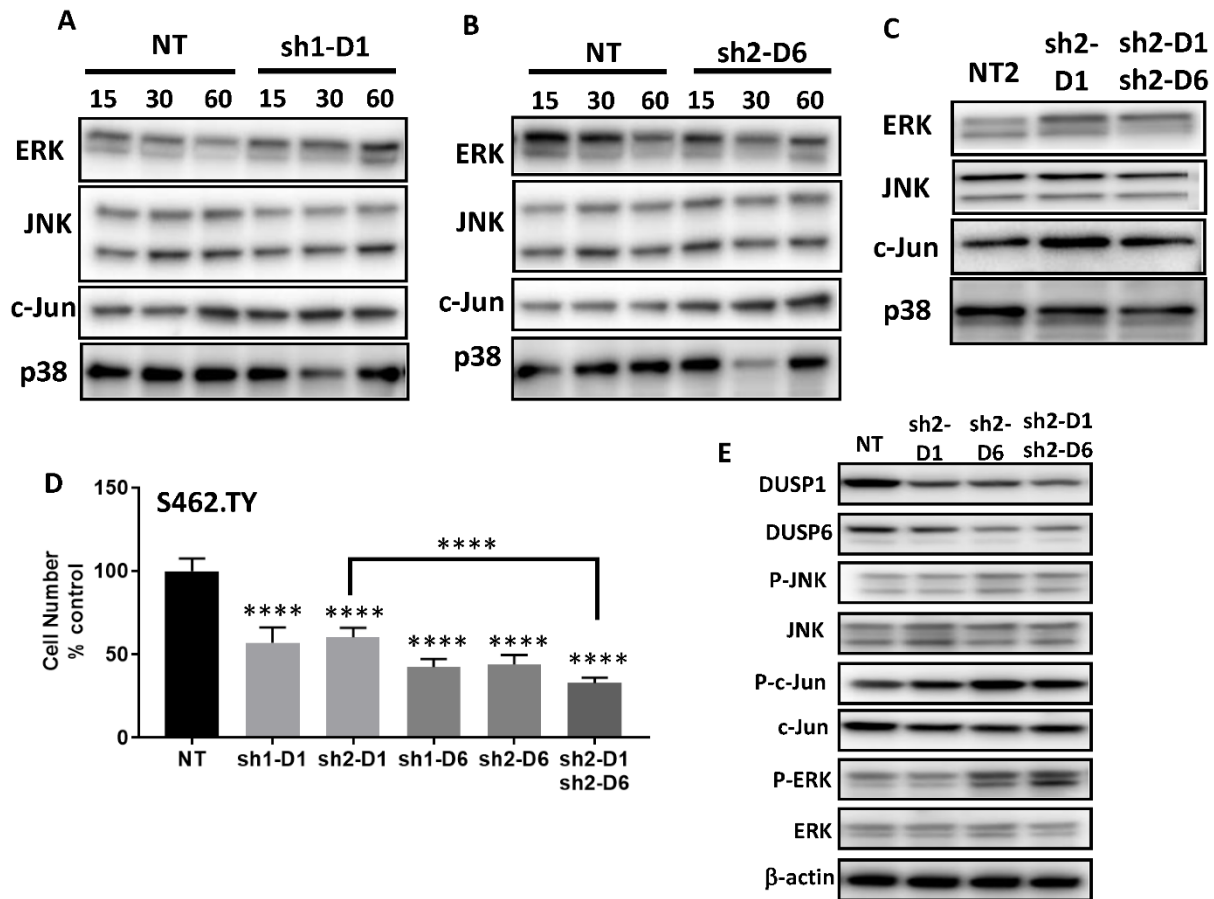

**Figure S2.** DUSP knockdown in MPNST cells. **A-C**, Immunoblot showing total levels ERK, JNK, c-jun and p38 in MPNST cell line ST8814 after shNT or with DUSP1 or 6 knockdown, or their combination. **D**, shDUSP1 or shDUSP6 in MPNST cell line S462.TY reduces cell proliferation alone and in combination with sh2-DUSP1 and sh2-DUSP6. (\*\*\*\*) represents  $P < 0.0001$ ,  $n = 5$ . **E**, S462.TY MPNST cells infected with indicated shRNA were starved overnight in media without serum. Cells were then stimulated with DMEM and 10% FBS for 15 minutes (min). Immunoblots were analyzed for DUSP1, DUSP6, p-JNK, p-c-jun and p-ERK and their totals with  $\beta$ -actin as a loading control.
