# Supplementary material
Source: PubMed Central journal article supplement (PMC6606396)
Supplement: NIHMS1526279-supplement-4.pdf [file NIHMS1526279-supplement-4.pdf]

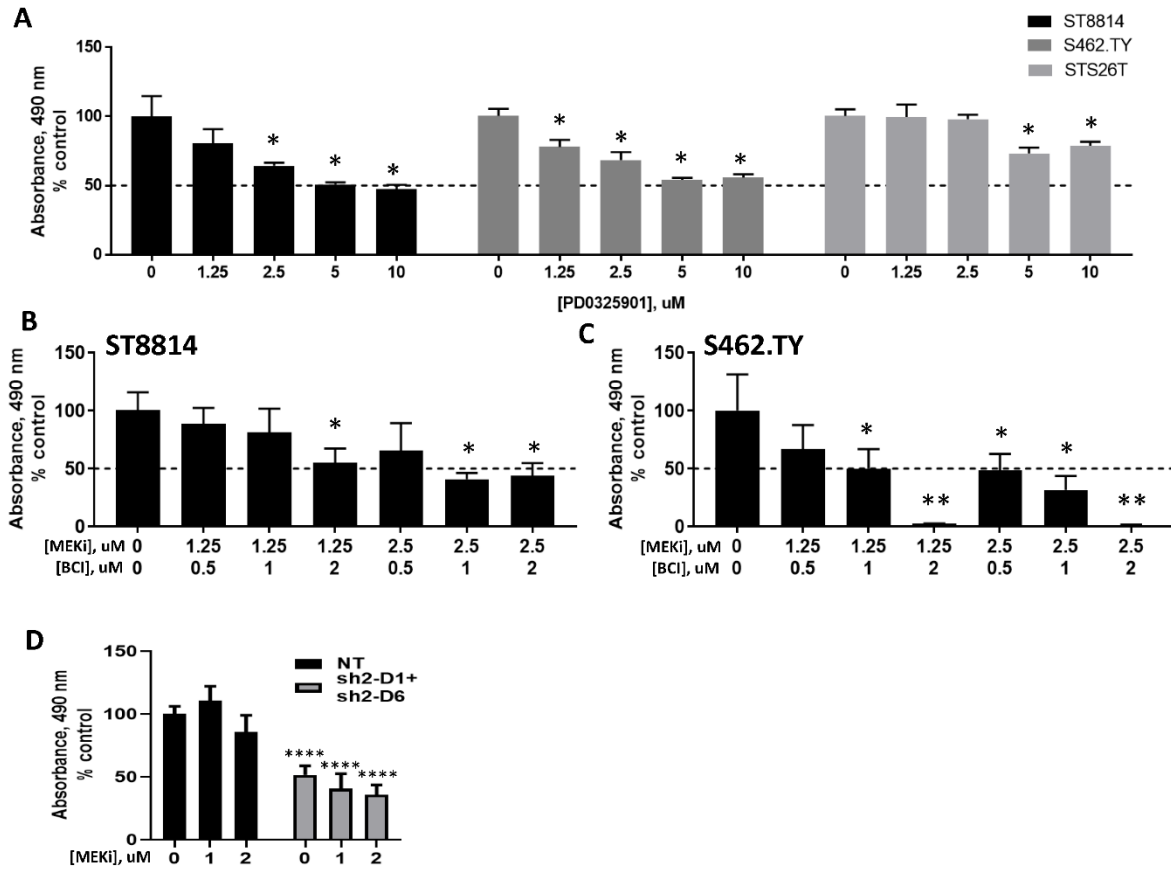

**Figure S4.** MEKi combination effects with BCI in MPNST cells. **A**, Human MPNST cell lines ST8814, S462.TY and STS26T treated with MEK inhibitor PD0325901. Cells were serum starved overnight and treated with PD0325901 in DMEM and 10% FBS then proliferation was measured with the MTS assay (OD at 490 nm) 3 days after treatment. **B**, Cell line ST8814 and **C**, cell line S462.TY treated with PD0325901 in combination with BCI with viability assessed as described above. **D**, Combination of PD0325901 with DUSP1 and 6 knockdown ST8814 MPNST cells with viability assessed as described above. (\*) represents  $P < 0.05$ , (\*\*) represents  $P < 0.01$ , (\*\*\*\*) $P < 0.0001$  compared to vehicle,  $n = 6$ .
