# Supplementary material
Source: PubMed Central journal article supplement (PMC6606396)
Supplement: NIHMS1526279-supplement-5.pdf [file NIHMS1526279-supplement-5.pdf]

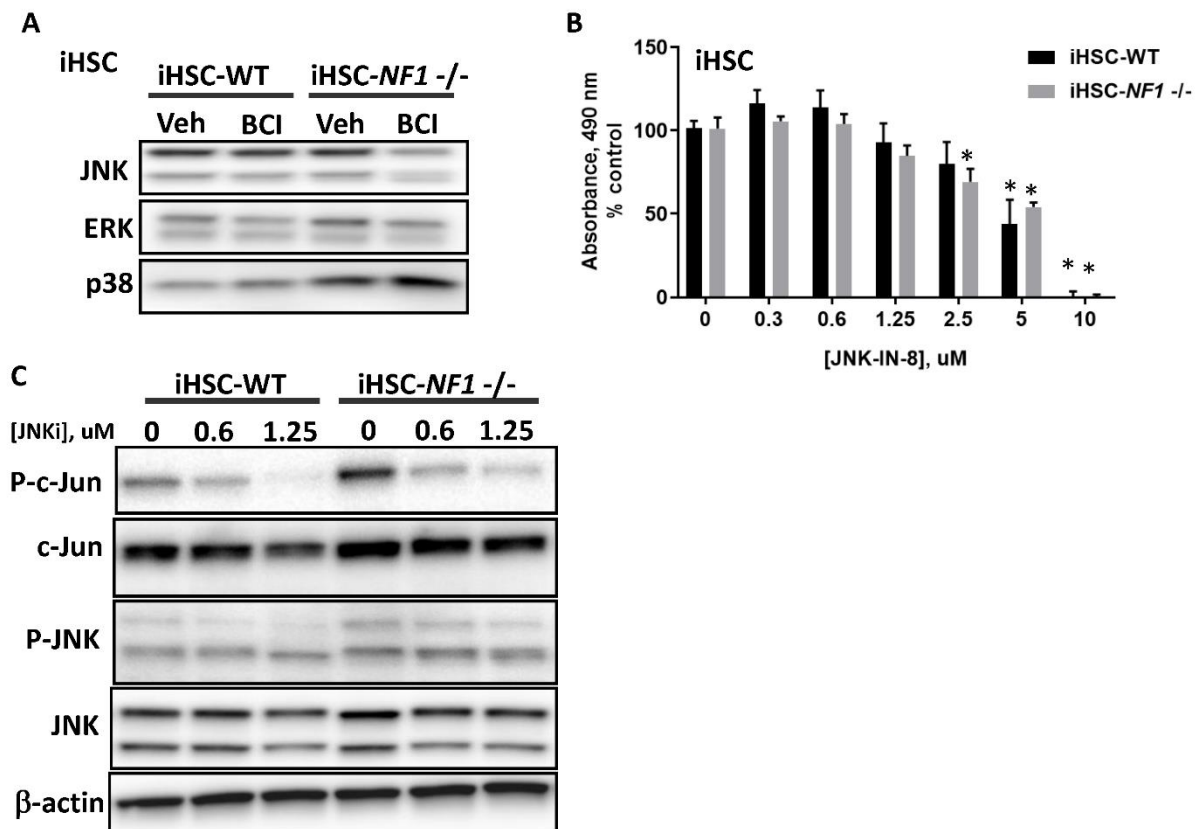

**Figure S5.** NF1 mediated effects in Schwann cells. **A**, Immunoblot of total levels of ERK, JNK, and p38 in immortalized human Schwann cells (iHSc) WT vs *NF1*<sup>-/-</sup> treated with BCI (1 uM). **B**, iHSC WT and *NF1*<sup>-/-</sup> cells were serum starved overnight and then treated with JNK inhibitor JNK-IN-8 in DMEM-F12 with N2 supplement and 10 ng/mL beta Heregulin (b-HRG). Cell survival was measured with the MTS assay 3 days after treatment. **C**, Immunoblot analysis of p-c-jun, c-jun, p-JNK and JNK after JNK inhibition. (\*) represents  $P < 0.05$  compared to vehicle,  $n = 6$ .
